# Supplementary material for: Multiferroism in hexagonally stabilized TmFeO3 thin films below 120 K
Source: Royal Society of Chemistry journal article supplement (doi:10.1039/c4tc00461b), 2014-01-01
Supplement: c4tc00461b1.pdf [file c4tc00461b1.pdf]

**Supplementary Information for:**

**Multiferroism in hexagonally stabilized TmFeO<sub>3</sub> thin films  
below 120 K**

**Suk-Jin Ahn,<sup>ad</sup> Jung-Hoon Lee,<sup>a</sup> Hyun Myung Jang<sup>ab\*</sup> and Young Kyu Jeong<sup>cd\*</sup>**

<sup>a</sup> Department of Materials Science and Engineering, Division of Advanced Materials Science, Pohang University of Science and Technology (POSTECH), Pohang 790-784, Republic of Korea

<sup>b</sup> Department of Physics, Pohang University of Science and Technology (POSTECH), Pohang 790-784, Republic of Korea

<sup>c</sup> Department of Materials Science and Engineering, Northwestern University, Evanston, IL 60208, USA

<sup>d</sup> Memory Manufacturing Operation Center, Samsung Electronics Co., Ltd., Hwaseongsi 449-711, Republic of Korea

\* To whom correspondence should be addressed: Hyun Myung Jang: [hmjang@postech.ac.kr](mailto:hmjang@postech.ac.kr) and Young Kyu Jeong: [young.jeong@northwestern.edu](mailto:young.jeong@northwestern.edu)

## Methods

### Film Fabrication and Characterizations.

An epitaxial Pt (111) film as the bottom-electrode layer was grown on the Al<sub>2</sub>O<sub>3</sub> (0001) substrate using RF magnetron sputtering. A pulsed laser deposition method was then used for the fabrication of a 60-nm-thick hexagonal TmFeO<sub>3</sub> (h-TFO) film layer on the Pt(111)/sapphire (Al<sub>2</sub>O<sub>3</sub>) substrate at a laser energy density of  $\sim 1.5 \text{ J/cm}^2$  with the repetition rate of 3 Hz. The substrate temperature was held at 850 °C in an oxygen ambience of 200 mtorr. After the PLD growth, a Pt top-electrode layer was deposited to make a capacitor structure.

The temperature-dependent spontaneous polarization was evaluated by measuring the pyrocurrent using a Keithley 487 picoammeter with a sweeping rate of 2 °C /min. Starting at 100 °C, the film was cooled down under an electric poling field of 800 kV/cm along the *c*-axis before measuring the pyroelectric current on heating. *P-E* hysteresis loops with a virtual ground mode were obtained using a Precision LC system (Radiant Technologies, Inc.). Magnetic properties were examined by measuring M-H (SQUID magnetometer, Quantum Design) and M(T) curves (MPMS).

### First Principles Calculations

We performed *ab initio* DFT calculations on the basis of the generalized gradient approximation (GGA) and the GGA + U method implemented with the projector augmented wave (PAW)<sup>S1,S2</sup> pseudopotential using the Vienna *ab initio* Simulation Package (VASP).<sup>S3,S4</sup> We adopted (i) a 5×5×3 Monkhorst-Pack *k*-point mesh centered at  $\Gamma$ ,<sup>S5</sup> (ii) a 500eV plane-wave cutoff energy, and (iii) the tetrahedron method with the Blöchl corrections for the Brillouin zone integrations.<sup>S6</sup> The Hubbard  $U_{eff}$  of 4.5 eV for Fe was chosen on the basis of previous studies.<sup>S7</sup> We explicitly treated 9 valence electrons for Tm ( $5p^65d^16s^2$ ), 8 for Fe ( $3d^64s^2$ ), and 6 for O ( $2s^22p^4$ ). All structural relaxation was performed with a Gaussian broadening of 0.05 eV.<sup>S7</sup> The ferroelectric polarization was calculated using the Berry-phase method.<sup>S8</sup>

## Optimized atomic positions in hexagonal TmFeO<sub>3</sub>

|     | P6 <sub>3</sub> cm |        |        | P6 <sub>3</sub> /mmc |        |        |
|-----|--------------------|--------|--------|----------------------|--------|--------|
|     | x                  | y      | z      | x                    | y      | z      |
| Tm1 | 0                  | 0      | 0.2766 | 0                    | 0      | 0.2500 |
| Tm2 | 0.3333             | 0.6667 | 0.2328 | 0.3333               | 0.6667 | 0.2500 |
| Fe  | 0.3337             | 0      | 0      | 0.3333               | 0      | 0      |
| O1  | 0.3056             | 0      | 0.1664 | 0.3333               | 0      | 0.1667 |
| O2  | 0.6394             | 0      | 0.3370 | 0.6667               | 0      | 0.3333 |
| O3  | 0                  | 0      | 0.4770 | 0                    | 0      | 0.5000 |
| O4  | 0.3333             | 0.6667 | 0.0209 | 0.3333               | 0.6667 | 0.0000 |

**Table S1.** In our density-functional theory (DFT) calculations, the following ground-state lattice parameters at zero pressure were obtained: the hexagonal unit-cell parameters of  $a = 6.0057 \text{ \AA}$  and  $c = 11.6867 \text{ \AA}$  for  $P6_3cm$  phase. Using these parameters, we also computed  $P6_3/mmc$  phase.

## Computed double-well potential

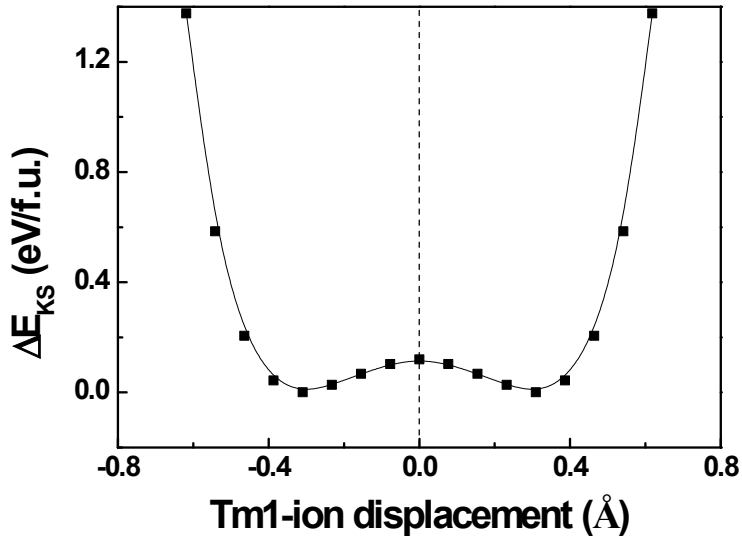

**Figure S1.** According to the computed double-well potential, the barrier height for the dipole switching along the  $c$  axis is 0.1198 eV per unit cell. This clearly demonstrates the thermodynamic stability of the ferroelectric  $P6_3cm$  phase over the centrosymmetric  $P6_3/mmc$  phase. The total Kohn-Sham (KS) energy calculations indicate that the ferroelectric  $P6_3cm$  phase is substantially more stable than these phases. According to our density-functional theory (DFT) calculations, the equilibrium off-center displacement of the Tm ion along the  $c$  axis is antiparallel to that of the  $O_A$  ion but with the same displacement of 0.290 Å. This indicates that the net off-centering distortion is 0.580 Å.

## Local distances between Tm and O ions

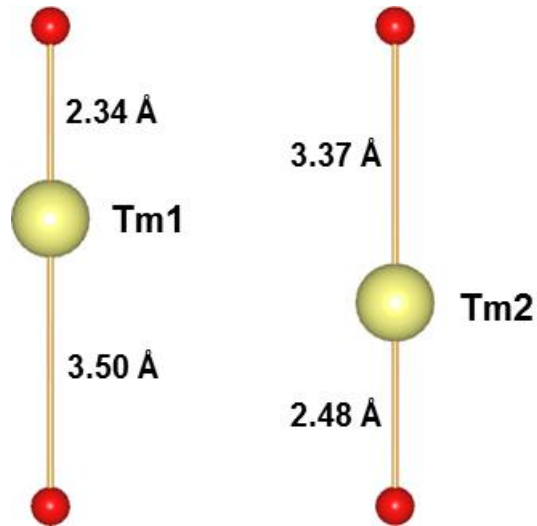

**Figure S2.** The h-TFO compound possesses two distinct Tm-ion sites in the ferroelectric state. The first dipole ( $O_A$ -Tm1- $O_A$ ) is antiparallel to the second one ( $O_A$ -Tm2- $O_A$ ). In addition, the amplitude of the local Tm1 off-centering is larger than that of the local Tm2 off-centering. Thus, the net polarization is parallel to the  $c$  axis of  $P6_3cm$ .

## Capacitance – Voltage Curves

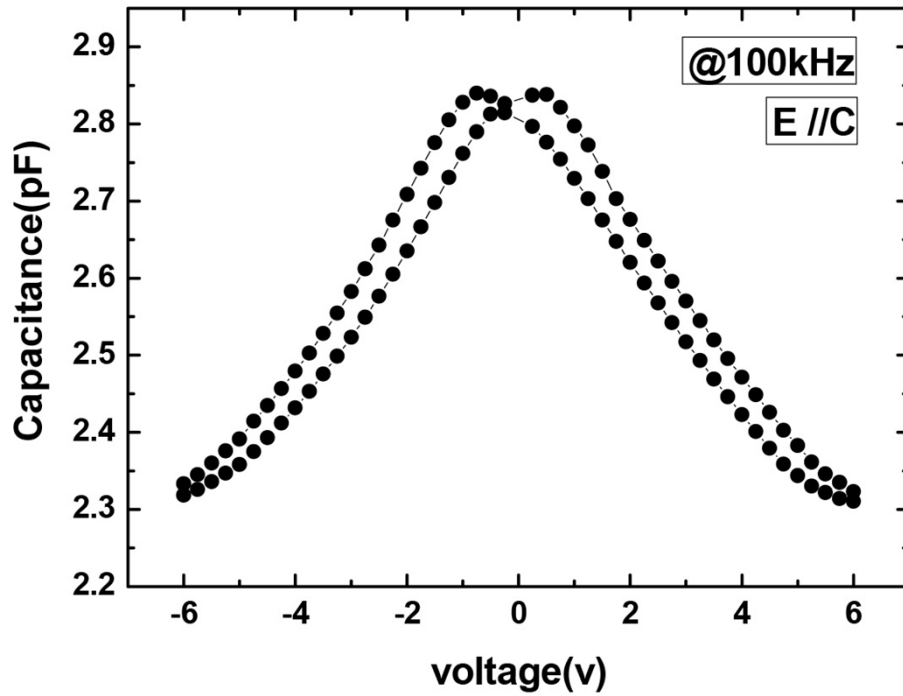

**Figure S3.** Capacitance-voltage curve of the Pt/h-TFO/Pt capacitor obtained at 100 kHz with the probing electric field parallel to the film-grown direction, [0001]. The ferroelectricity with a non-zero remnant polarization was also confirmed by obtaining a butterfly-shaped hysteresis C-V curve.

## Pyroelectric Current Data

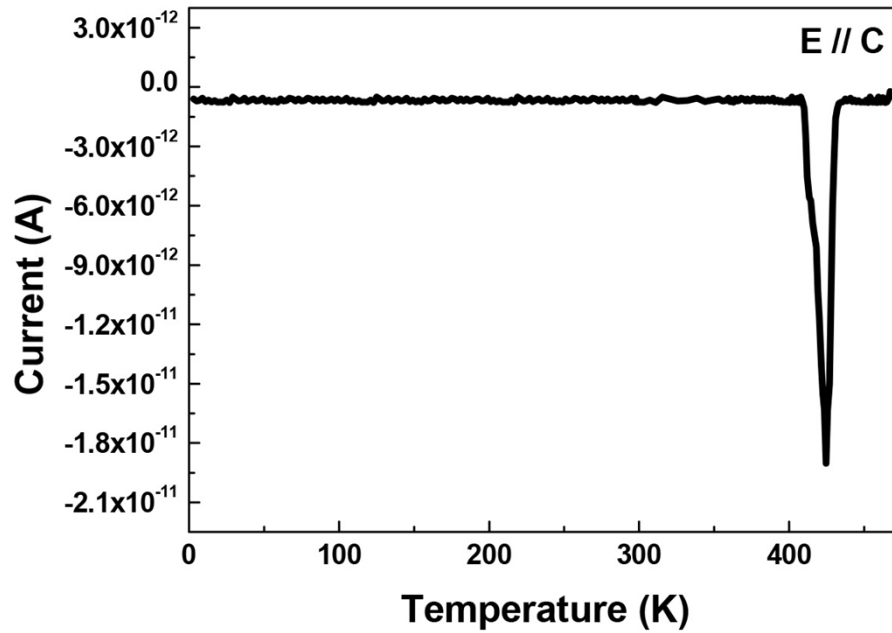

**Figure S4.** Temperature-dependent pyroelectric current of the h-TFO film obtained using a Keithley 487 picoammeter with a sweeping rate of  $2^\circ\text{C}/\text{min}$ . The onset of the para-to-ferroelectric transition is observed at  $\sim 430$  K ( $T_c$ , Curie temperature), as described in the main manuscript.

## Temperature dependent relative dielectric permittivity curves

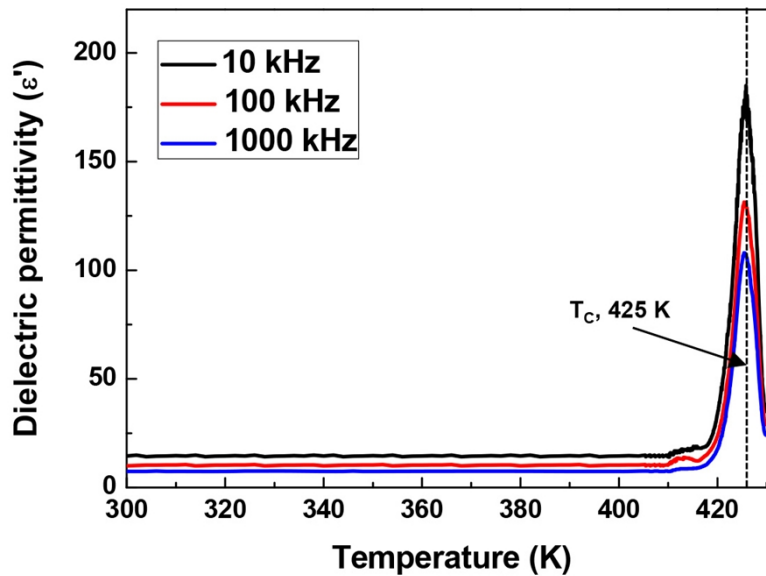

**Figure S5.** Temperature dependent relative dielectric permittivity curves of the h-TFO film measured at various ac probing frequencies. Note that the peak temperature of the dielectric permittivity coincides well with the onset of the ferroelectric transition at  $\sim 430$  K.

### \* References

- (S1) P. E. Blöchl, *Phys. Rev. B*, 1994, **50**, 17953.
- (S2) G. Kresse, D. Joubert, *Phys. Rev. B*, 1999, **59**, 1758.
- (S3) G. Kresse, J. Hafner, *Phys. Rev. B*, 1993, **47**, 558.
- (S4) G. Kresse, J. Furthmüller, *Phys. Rev. B*, 1996, **54**, 11169.
- (S5) H. J. Monkhorst, J. D. Pack, *Phys. Rev. B*, 1976, **13**, 5188.
- (S6) P. E. Blöchl, O. Jepsen, O. K. Andersen, *Phys. Rev. B*, 1994, **49**, 16223.
- (S7) Y. K. Jeong, J.-H. Lee, S.-J. Ahn, S.-W. Song, H. M. Jang, H. Choi, J. F. Scott, *J. Am. Chem. Soc.* 2012, **134**, 1450.
- (S8) R. D. King-Smith, D. Vanderbilt, *Phys. Rev. B*, 1993, **47**, 1651; D. Vanderbilt, R. D. King-Smith, *ibid* 1993, **48**, 4442.
